# Supplementary material for: Disclosing Early Excited State Relaxation Events in Prototypical Linear Carbon Chains
Source: PubMed Central journal article supplement (PMC10450801; doi:10.1021/jacs.3c04163), 2023-08-01
Supplement: ja3c04163_si_001.pdf [file ja3c04163_si_001.pdf]

# Disclosing Early Excited State Relaxation Events in Prototypical Linear Carbon Chains

Piotr Kabaciński,<sup>1</sup> Pietro Marabotti,<sup>2</sup> Daniele Fazzi,<sup>3\*</sup> Vasilis Petropoulos,<sup>1</sup> Andrea Iudica,<sup>1</sup> Patrick Serafini,<sup>2</sup> Giulio Cerullo,<sup>1,4</sup> Carlo S. Casari,<sup>2\*</sup> Margherita Zavelani-Rossi,<sup>2,4\*</sup>

<sup>1</sup> Dipartimento di Fisica, Politecnico di Milano, p.za Leonardo da Vinci 32, 20133 Milano, Italy

<sup>2</sup> Dipartimento di Energia, Politecnico di Milano, via G. Ponzio 34/3, 20133 Milano, Italy

<sup>3</sup> Dipartimento di Chimica “Giacomo Ciamician”, Università degli studi di Bologna, via F. Selmi 2, 40126 Bologna, Italy

<sup>4</sup> Istituto di Fotonica e Nanotecnologie-CNR, piazza Leonardo da Vinci 32, 20133 Milano, Italy  
e-mail address: [margherita.zavelani@polimi.it](mailto:margherita.zavelani@polimi.it); [carlo.casari@polimi.it](mailto:carlo.casari@polimi.it); [daniele.fazzi@unibo.it](mailto:daniele.fazzi@unibo.it)

## SUPPORTING INFORMATION

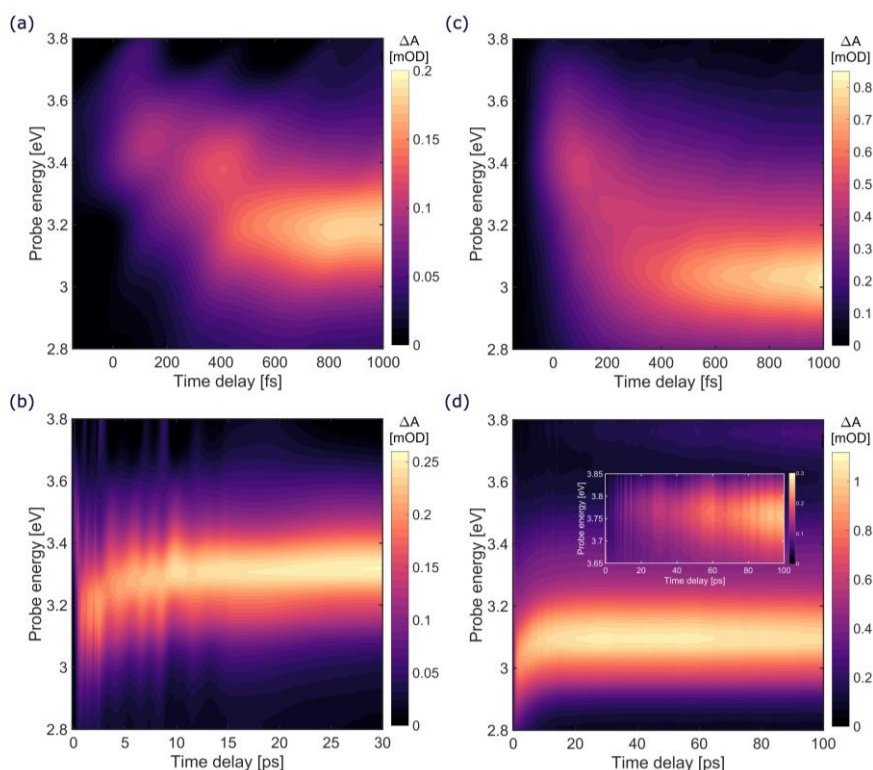

**Figure S1.** Transient differential absorption maps of HC<sub>12</sub> polyynes with different end groups (methyl and cyano) on different time scale; (a,b) H-(C≡C)<sub>6</sub>-CH<sub>3</sub> pumped at 4.44 eV (279 nm); (c,d) H-(C≡C)<sub>6</sub>-CN pumped at 4.32 eV (287 nm); inset: zoom out of the 3.65-3.85 eV region, rescaled.

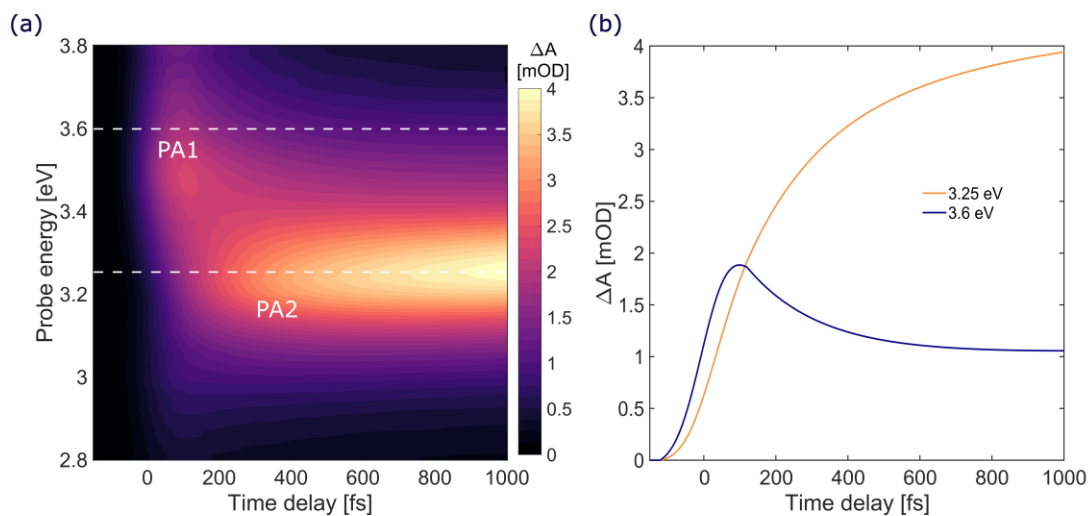

**Figure S2.** (a) EAS obtained from the global analysis of the TA data of HC<sub>12</sub>H; (b) corresponding TA dynamics at selected probe photon energies, corresponding to the two PA bands (PA 1 blue line and PA 2 orange line)

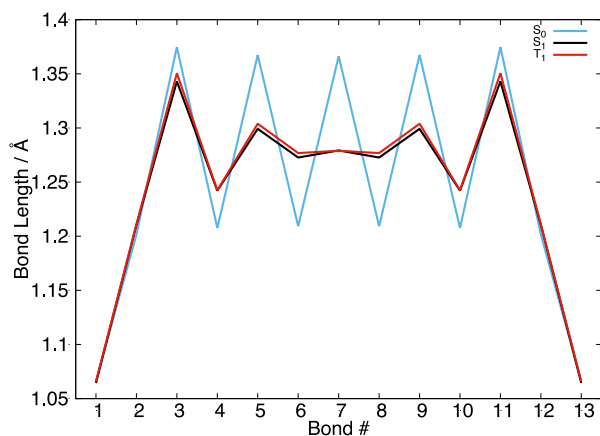

**Figure S3:** Computed equilibrium bond lengths (Å) for HC<sub>12</sub>H in the optimized ground state S<sub>0</sub> (light blue line), first (dark) excited state S<sub>1</sub> (dark) and triplet state T<sub>1</sub> (red).  $\omega$ B97X-D3BJ data.

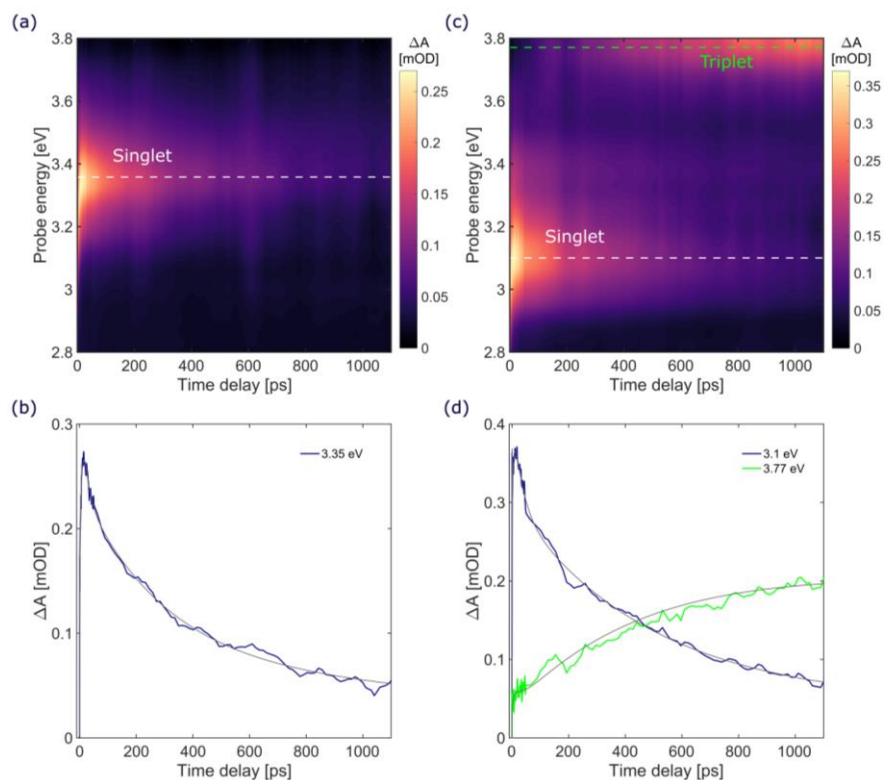

**Figure S4.** TA data on the long time scale, up to 1.1 ns, (a,c) maps and (b,d) dynamics for selected wavelengths together with bi-exponential fitting curve obtained by global fitting analysis (black lines) for HC<sub>12</sub> polyynes with different end groups (methyl and cyano); (a,b) H-(C≡C)<sub>6</sub>-CH<sub>3</sub>, time constants ~15 ps, ~290 ps; (c,d) H-(C≡C)<sub>6</sub>-CN time constants ~30 ps, ~500 ps; here the PA of the triplet state (centered at about 3.77 eV) appears.

## Computational (DFT, TD-DFT and TDA) data

### Optimized geometries

Optimized (wB97X-D3BJ def2-TZVP) ground state ( $S_0$ ) geometry for HC<sub>12</sub>H

14

|   |                   |                   |                   |
|---|-------------------|-------------------|-------------------|
| H | 0.00000008075489  | -0.00000042880016 | 8.10938967974933  |
| C | 0.00000010571831  | -0.00000025841304 | 7.04344348824528  |
| C | 0.00000009266466  | -0.00000008622005 | 5.84190140146244  |
| C | 0.00000006247950  | 0.00000008566202  | 4.46727231805684  |
| C | 0.00000002365473  | 0.00000022482420  | 3.25970101252309  |
| C | -0.00000005310736 | 0.00000031862900  | 1.89229803243581  |
| C | -0.00000012981289 | 0.00000033558428  | 0.68308119445412  |
| C | -0.00000019510128 | 0.00000026930375  | -0.68308103852485 |
| C | -0.00000020240086 | 0.00000016683383  | -1.89229790643410 |
| C | -0.00000016324765 | 0.00000003255490  | -3.25970095847324 |
| C | -0.00000007934853 | -0.00000007357661 | -4.46727235326350 |
| C | 0.00000003811484  | -0.00000015484326 | -5.84190148128879 |
| C | 0.00000015553554  | -0.00000020417574 | -7.04344360021106 |
| H | 0.00000026409611  | -0.00000022736312 | -8.10938978873136 |

Optimized (B2PLYP/D3 def2-TZVP) ground state ( $S_0$ ) geometry for HC<sub>12</sub>H

14

|   |                   |                   |                   |
|---|-------------------|-------------------|-------------------|
| H | -0.00017207924244 | 0.00041803745099  | 8.09680152484801  |
| C | -0.00011812484375 | 0.00025037149724  | 7.03433754015696  |
| C | -0.00005168089492 | 0.00007364761763  | 5.81864303750134  |
| C | 0.00002992449213  | -0.00010241542689 | 4.46722292150165  |
| C | 0.00011768708201  | -0.00019886130492 | 3.23933749583188  |
| C | 0.00013633395143  | -0.00028233068579 | 1.90023072552564  |
| C | 0.00012259981764  | -0.00025354994907 | 0.66805465506586  |
| C | 0.00010489543299  | -0.00021831545959 | -0.66828260645495 |
| C | 0.00010351774378  | -0.00008395681823 | -1.90017648682808 |
| C | 0.00004664108122  | -0.00007464902566 | -3.23925451406323 |
| C | -0.00004338181496 | -0.00015578098689 | -4.46714291471396 |
| C | -0.00009882917516 | -0.00006745663819 | -5.81857612963456 |
| C | -0.00009000271994 | 0.00022886170767  | -7.03436453345546 |
| H | -0.00008750091002 | 0.00046639802169  | -8.09683071528109 |

Optimized (TD-wB97X-D3BJ def2-TZVP) excited state ( $S_1$ ) geometry for HC<sub>12</sub>H

14

|   |                   |                   |                  |
|---|-------------------|-------------------|------------------|
| H | 0.00000046028401  | -0.00000259154718 | 8.07137675529965 |
| C | 0.00000023869049  | -0.00000173959360 | 7.00685729527599 |
| C | -0.00000005266064 | -0.00000079610272 | 5.79658881007522 |

|   |                   |                   |                   |
|---|-------------------|-------------------|-------------------|
| C | -0.00000034093049 | 0.00000020592243  | 4.45354793473270  |
| C | -0.00000045283280 | 0.00000107329562  | 3.21145764919539  |
| C | -0.00000035741116 | 0.00000177176198  | 1.91230264736089  |
| C | -0.00000015639080 | 0.00000215454095  | 0.63957854488649  |
| C | 0.00000005865348  | 0.00000216687461  | -0.63957841609106 |
| C | 0.00000020930852  | 0.00000175893411  | -1.91230242275419 |
| C | 0.00000027165384  | 0.00000100607638  | -3.21145777021034 |
| C | 0.00000020740317  | 0.00000006278390  | -4.45354784518386 |
| C | 0.00000005382095  | -0.00000095750061 | -5.79658895642246 |
| C | -0.00000004481622 | -0.00000174597510 | -7.00685737764865 |
| H | -0.00000009477235 | -0.00000236947077 | -8.07137684851577 |

Optimized (TD-wB97X-D3BJ def2-TZVP) triplet state ( $T_1$ ) geometry for  $\text{HC}_{12}\text{H}$

14

|   |                   |                   |                   |
|---|-------------------|-------------------|-------------------|
| H | 0.00000017481086  | 0.00000044972401  | 8.08990840802570  |
| C | 0.00000013447646  | 0.00000024987933  | 7.02413049709870  |
| C | 0.00000008722620  | 0.00000005312923  | 5.81312815366413  |
| C | 0.00000003216242  | -0.00000012014285 | 4.46266799046614  |
| C | -0.00000001774053 | -0.00000022360658 | 3.22014690508755  |
| C | -0.00000007943104 | -0.00000026000466 | 1.91626229759867  |
| C | -0.00000013577840 | -0.00000025907115 | 0.63943935803695  |
| C | -0.00000020733300 | -0.00000024252876 | -0.63943930625782 |
| C | -0.00000024576652 | -0.00000018523203 | -1.91626223818848 |
| C | -0.00000023008352 | -0.00000010312039 | -3.22014686301095 |
| C | -0.00000010816838 | 0.00000000337398  | -4.46266799611492 |
| C | 0.00000004650509  | 0.00000012304644  | -5.81312817665697 |
| C | 0.00000020285045  | 0.00000021563688  | -7.02413054535727 |
| H | 0.00000034626991  | 0.00000029891654  | -8.08990848439144 |

Optimized (wB97X-D3BJ def2-TZVP) ground state ( $S_0$ ) geometry for  $\text{HC}_{12}\text{CH}_3$

17

|   |                   |                   |                   |
|---|-------------------|-------------------|-------------------|
| H | 0.01592364241943  | -0.03164115369698 | 8.91516259220102  |
| C | 0.01026673357866  | -0.02971290646687 | 7.84931857462199  |
| C | 0.00396429470628  | -0.02748672859209 | 6.64768946107539  |
| C | -0.00294962746468 | -0.02466360992110 | 5.27293075292177  |
| C | -0.00855423465083 | -0.02175023737810 | 4.06525012223177  |
| C | -0.01394200084327 | -0.01753820639666 | 2.69778812884552  |
| C | -0.01753537886202 | -0.01272433555582 | 1.48835976635756  |
| C | -0.01970832035771 | -0.00547898697795 | 0.12226446002656  |
| C | -0.01953841002695 | 0.00295903659551  | -1.08738012150632 |
| C | -0.01637197458588 | 0.01547736341717  | -2.45437905408450 |
| C | -0.01047501673671 | 0.02961143370833  | -3.66284899486258 |
| C | 0.00063155124838  | 0.05072651257745  | -5.03583727454672 |
| C | 0.01077008725596  | 0.07346070640377  | -6.23950651589081 |

|   |                   |                   |                   |
|---|-------------------|-------------------|-------------------|
| C | 0.03479235016600  | 0.10019958844555  | -7.69678589421651 |
| H | -0.95881550666058 | 0.32329291870180  | -8.09187571520119 |
| H | 0.35487801918986  | -0.86711407397764 | -8.09046064392988 |
| H | 0.72818292282430  | 0.86547559242720  | -8.05260208855686 |

Optimized (UwB97X-D3BJ def2-TZVP) triplet state (T<sub>1</sub>) geometry for HC<sub>12</sub>CH<sub>3</sub>

17

|   |           |           |           |
|---|-----------|-----------|-----------|
| H | -8.926176 | -0.006608 | 0.009776  |
| C | -7.861359 | -0.004812 | 0.007641  |
| C | -6.649696 | -0.003399 | 0.004996  |
| C | -5.303435 | -0.001714 | 0.001837  |
| C | -4.060505 | -0.000046 | -0.001107 |
| C | -2.758523 | 0.000162  | -0.003661 |
| C | -1.483877 | 0.003835  | -0.004323 |
| C | -0.205653 | 0.003328  | -0.004322 |
| C | 1.070993  | 0.005205  | -0.005224 |
| C | 2.368882  | 0.006040  | -0.005983 |
| C | 3.615592  | 0.007338  | -0.006550 |
| C | 4.956410  | 0.004930  | -0.006557 |
| C | 6.172081  | 0.000537  | -0.009427 |
| C | 7.623592  | -0.001691 | 0.009709  |
| H | 8.016157  | -0.693747 | -0.738166 |
| H | 7.929575  | -0.402925 | 0.982576  |
| H | 8.073428  | 0.984998  | -0.116355 |

Optimized (wB97X-D3BJ def2-TZVP) ground state (S<sub>0</sub>) geometry for HC<sub>12</sub>CN

15

|   |           |           |           |
|---|-----------|-----------|-----------|
| H | -0.000001 | -0.000001 | 9.433156  |
| C | -0.000000 | -0.000001 | 8.367003  |
| C | -0.000000 | -0.000000 | 7.165622  |
| C | 0.000000  | 0.000000  | 5.791331  |
| C | 0.000000  | 0.000000  | 4.583844  |
| C | 0.000000  | 0.000001  | 3.217029  |
| C | 0.000000  | 0.000001  | 2.007843  |
| C | 0.000000  | 0.000001  | 0.642685  |
| C | 0.000000  | 0.000001  | -0.566711 |
| C | 0.000000  | 0.000000  | -1.931931 |
| C | 0.000000  | 0.000000  | -3.140514 |
| C | 0.000000  | 0.000000  | -4.507927 |
| C | -0.000000 | -0.000000 | -5.713015 |
| C | -0.000000 | -0.000001 | -7.092296 |
| N | -0.000001 | -0.000001 | -8.244652 |

Optimized (UwB97X-D3BJ def2-TZVP) triplet state (T<sub>1</sub>) geometry for HC<sub>12</sub>CN

15

|   |          |          |           |
|---|----------|----------|-----------|
| H | 0.000000 | 0.000000 | -9.326275 |
| C | 0.000000 | 0.000000 | -8.262042 |
| C | 0.000000 | 0.000000 | -7.052671 |
| C | 0.000000 | 0.000000 | -5.709223 |
| C | 0.000000 | 0.000000 | -4.472288 |
| C | 0.000000 | 0.000000 | -3.167922 |
| C | 0.000000 | 0.000000 | -1.901532 |
| C | 0.000000 | 0.000000 | -0.624852 |
| C | 0.000000 | 0.000000 | 0.652946  |
| C | 0.000000 | 0.000000 | 1.935593  |
| C | 0.000000 | 0.000000 | 3.193262  |
| C | 0.000000 | 0.000000 | 4.509209  |
| C | 0.000000 | 0.000000 | 5.736338  |
| C | 0.000000 | 0.000000 | 7.093003  |
| N | 0.000000 | 0.000000 | 8.249622  |

## Excited States

Excited state energies (vertical transitions as computed on the optimized wB97X-D3BJ geometry) at the TDA level (first 20 excited states). States S1 and S10 are highlighted for clarity.

| -----<br>ABSORPTION SPECTRUM VIA TRANSITION ELECTRIC DIPOLE MOMENTS<br>----- |                  |                    |                    |                 |                 |                 |                |
|------------------------------------------------------------------------------|------------------|--------------------|--------------------|-----------------|-----------------|-----------------|----------------|
| State                                                                        | Energy<br>(cm-1) | Wavelength<br>(nm) | fosc               | T2<br>(au**2)   | TX<br>(au)      | TY<br>(au)      | TZ<br>(au)     |
| <b>1</b>                                                                     | <b>26514.4</b>   | <b>377.2</b>       | <b>0.000000000</b> | <b>0.00000</b>  | <b>0.00000</b>  | <b>-0.00000</b> | <b>0.00000</b> |
| 2                                                                            | 27136.8          | 368.5              | 0.000000000        | 0.00000         | -0.00000        | -0.00000        | -0.00001       |
| 3                                                                            | 27149.1          | 368.3              | 0.000000000        | 0.00000         | -0.00000        | 0.00000         | -0.00001       |
| 4                                                                            | 34500.2          | 289.9              | 0.000000000        | 0.00000         | -0.00000        | 0.00000         | -0.00000       |
| 5                                                                            | 35627.7          | 280.7              | 0.000000000        | 0.00000         | 0.00000         | 0.00000         | 0.00001        |
| 6                                                                            | 35641.0          | 280.6              | 0.000000000        | 0.00000         | -0.00000        | 0.00000         | 0.00001        |
| 7                                                                            | 43419.3          | 230.3              | 0.000000000        | 0.00000         | 0.00000         | -0.00000        | 0.00000        |
| 8                                                                            | 45057.8          | 221.9              | 0.000000000        | 0.00000         | -0.00000        | -0.00000        | 0.00000        |
| 9                                                                            | 45073.0          | 221.9              | 0.000000001        | 0.00000         | 0.00000         | -0.00000        | -0.00009       |
| <b>10</b>                                                                    | <b>47171.8</b>   | <b>212.0</b>       | <b>8.724275389</b> | <b>60.88673</b> | <b>-0.00000</b> | <b>-0.00000</b> | <b>7.80299</b> |
| 11                                                                           | 51807.5          | 193.0              | 0.000000000        | 0.00000         | 0.00000         | -0.00000        | -0.00000       |
| 12                                                                           | 53842.9          | 185.7              | 0.000000000        | 0.00000         | -0.00000        | -0.00000        | -0.00001       |
| 13                                                                           | 53861.4          | 185.7              | 0.000000000        | 0.00000         | 0.00000         | -0.00000        | -0.00001       |
| 14                                                                           | 54285.0          | 184.2              | 0.000000000        | 0.00000         | 0.00000         | 0.00000         | 0.00001        |
| 15                                                                           | 54289.9          | 184.2              | 0.000000000        | 0.00000         | -0.00000        | 0.00000         | -0.00002       |
| 16                                                                           | 54311.0          | 184.1              | 0.000000000        | 0.00000         | -0.00000        | 0.00000         | 0.00000        |
| 17                                                                           | 55211.1          | 181.1              | 0.000000002        | 0.00000         | 0.00000         | 0.00000         | -0.00010       |
| 18                                                                           | 58492.8          | 171.0              | 0.000000000        | 0.00000         | -0.00000        | -0.00000        | -0.00000       |
| 19                                                                           | 60759.5          | 164.6              | 0.000000000        | 0.00000         | 0.00000         | -0.00000        | 0.00000        |
| 20                                                                           | 60781.6          | 164.5              | 0.000000000        | 0.00000         | 0.00000         | -0.00000        | -0.00000       |

Excited state energies (vertical transitions as computed on the optimized wB97X-D3BJ geometry) at the TD-DFT level (first 20 excited states). States S1 and S10 are highlighted for clarity.

| -----<br>ABSORPTION SPECTRUM VIA TRANSITION ELECTRIC DIPOLE MOMENTS<br>----- |                  |                    |                    |                 |                 |                 |                 |
|------------------------------------------------------------------------------|------------------|--------------------|--------------------|-----------------|-----------------|-----------------|-----------------|
| State                                                                        | Energy<br>(cm-1) | Wavelength<br>(nm) | fosc               | T2<br>(au**2)   | TX<br>(au)      | TY<br>(au)      | TZ<br>(au)      |
| <b>1</b>                                                                     | <b>25492.0</b>   | <b>392.3</b>       | <b>0.000000000</b> | <b>0.00000</b>  | <b>-0.00000</b> | <b>-0.00000</b> | <b>0.00000</b>  |
| 2                                                                            | 26373.1          | 379.2              | 0.000000000        | 0.00000         | -0.00000        | 0.00000         | -0.00001        |
| 3                                                                            | 26390.3          | 378.9              | 0.000000000        | 0.00000         | 0.00000         | 0.00000         | 0.00001         |
| 4                                                                            | 33886.8          | 295.1              | 0.000000000        | 0.00000         | -0.00000        | -0.00000        | 0.00000         |
| 5                                                                            | 35239.8          | 283.8              | 0.000000000        | 0.00000         | -0.00000        | -0.00000        | 0.00001         |
| 6                                                                            | 35256.1          | 283.6              | 0.000000000        | 0.00000         | 0.00000         | 0.00002         | -0.00001        |
| 7                                                                            | 43066.7          | 232.2              | 0.000000000        | 0.00000         | 0.00001         | -0.00000        | 0.00000         |
| <b>8</b>                                                                     | <b>43498.4</b>   | <b>229.9</b>       | <b>6.104502598</b> | <b>46.20118</b> | <b>-0.00000</b> | <b>-0.00000</b> | <b>-6.79715</b> |
| 9                                                                            | 44870.7          | 222.9              | 0.000000000        | 0.00000         | 0.00000         | -0.00000        | -0.00004        |
| 10                                                                           | 44887.8          | 222.8              | 0.000000001        | 0.00000         | 0.00000         | -0.00000        | -0.00010        |
| 11                                                                           | 51593.0          | 193.8              | 0.000000000        | 0.00000         | -0.00000        | -0.00000        | 0.00000         |
| 12                                                                           | 53738.3          | 186.1              | 0.000000000        | 0.00000         | 0.00000         | -0.00000        | 0.00000         |



|    |         |       |             |         |          |          |          |
|----|---------|-------|-------------|---------|----------|----------|----------|
| 13 | 53758.4 | 186.0 | 0.000000000 | 0.00000 | 0.00000  | -0.00000 | 0.00000  |
| 14 | 54088.7 | 184.9 | 0.000000000 | 0.00000 | 0.00000  | 0.00000  | 0.00000  |
| 15 | 54094.6 | 184.9 | 0.000000000 | 0.00000 | 0.00000  | -0.00000 | 0.00002  |
| 16 | 54117.1 | 184.8 | 0.000000000 | 0.00000 | -0.00001 | 0.00000  | 0.00000  |
| 17 | 54604.9 | 183.1 | 0.000000001 | 0.00000 | 0.00000  | 0.00000  | -0.00008 |
| 18 | 58348.0 | 171.4 | 0.000000000 | 0.00000 | 0.00000  | 0.00000  | -0.00000 |
| 19 | 60686.7 | 164.8 | 0.000000000 | 0.00000 | -0.00000 | -0.00000 | 0.00000  |
| 20 | 60710.1 | 164.7 | 0.000000000 | 0.00000 | 0.00000  | -0.00000 | -0.00000 |

Excited state energies (vertical transitions as computed on the optimized B2PLYP geometry) at the TDA level (first 20 excited states). States S1 and S10 are highlighted for clarity.

-----

ABSORPTION SPECTRUM VIA TRANSITION ELECTRIC DIPOLE MOMENTS

-----

| State     | Energy<br>(cm-1) | Wavelength<br>(nm) | fosc               | T2<br>(au**2)   | TX<br>(au)      | TY<br>(au)     | TZ<br>(au)      |
|-----------|------------------|--------------------|--------------------|-----------------|-----------------|----------------|-----------------|
| <b>1</b>  | <b>22742.1</b>   | <b>439.7</b>       | <b>0.000000000</b> | <b>0.00000</b>  | <b>0.00000</b>  | <b>0.00000</b> | <b>-0.00000</b> |
| 2         | 23340.2          | 428.4              | 0.000000000        | 0.00000         | 0.00000         | 0.00000        | -0.00000        |
| 3         | 23344.2          | 428.4              | 0.000000000        | 0.00000         | 0.00000         | -0.00000       | -0.00000        |
| 4         | 32516.8          | 307.5              | 0.000000000        | 0.00000         | 0.00000         | 0.00000        | 0.00000         |
| 5         | 33606.0          | 297.6              | 0.000000000        | 0.00000         | -0.00000        | 0.00000        | 0.00000         |
| 6         | 33609.2          | 297.5              | 0.000000000        | 0.00000         | -0.00000        | 0.00000        | -0.00000        |
| 7         | 42081.1          | 237.6              | 0.000000000        | 0.00000         | -0.00000        | 0.00000        | -0.00000        |
| 8         | 43533.3          | 229.7              | 0.000000000        | 0.00000         | 0.00000         | 0.00000        | 0.00000         |
| 9         | 43535.4          | 229.7              | 0.000000000        | 0.00000         | -0.00000        | -0.00000       | 0.00000         |
| <b>10</b> | <b>39767.2</b>   | <b>251.5</b>       | <b>9.057809931</b> | <b>74.98495</b> | <b>-0.00000</b> | <b>0.00000</b> | <b>8.65938</b>  |
| 11        | 39726.5          | 251.7              | 0.000000000        | 0.00000         | -0.00000        | 0.00000        | 0.00000         |
| 12        | 39728.1          | 251.7              | 0.000000000        | 0.00000         | 0.00000         | -0.00000       | -0.00000        |
| 13        | 40033.4          | 249.8              | 0.000000000        | 0.00000         | -0.00000        | 0.00000        | 0.00000         |
| 14        | 36068.5          | 277.3              | 0.000000000        | 0.00000         | -0.00000        | 0.00000        | -0.00000        |
| 15        | 50270.0          | 198.9              | 0.000000000        | 0.00000         | -0.00000        | 0.00000        | 0.00000         |
| 16        | 51828.0          | 192.9              | 0.000000000        | 0.00000         | -0.00000        | 0.00000        | 0.00000         |
| 17        | 51829.2          | 192.9              | 0.000000000        | 0.00000         | 0.00000         | -0.00000       | 0.00000         |
| 18        | 55945.1          | 178.7              | 0.000000000        | 0.00000         | 0.00000         | -0.00000       | 0.00000         |
| 19        | 49127.6          | 203.6              | 0.000000000        | 0.00000         | 0.00000         | -0.00000       | 0.00000         |
| 20        | 48833.2          | 204.8              | 0.000000000        | 0.00000         | -0.00000        | -0.00000       | -0.00001        |

Excited state energies (vertical transitions as computed on the optimized B2PLYP geometry) at the TD-DFT level (first 20 excited states). States S1 and S10 are highlighted for clarity.

-----

ABSORPTION SPECTRUM VIA TRANSITION ELECTRIC DIPOLE MOMENTS

-----

| State    | Energy<br>(cm-1) | Wavelength<br>(nm) | fosc               | T2<br>(au**2)  | TX<br>(au)      | TY<br>(au)     | TZ<br>(au)      |
|----------|------------------|--------------------|--------------------|----------------|-----------------|----------------|-----------------|
| <b>1</b> | <b>20551.4</b>   | <b>486.6</b>       | <b>0.000000000</b> | <b>0.00000</b> | <b>-0.00000</b> | <b>0.00000</b> | <b>-0.00000</b> |
| 2        | 23544.3          | 424.7              | 0.000000000        | 0.00000        | 0.00000         | 0.00000        | 0.00000         |
| 3        | 23556.6          | 424.5              | 0.000000000        | 0.00000        | -0.00000        | 0.00000        | -0.00000        |
| 4        | 31070.7          | 321.8              | 0.000000000        | 0.00000        | -0.00000        | 0.00000        | -0.00000        |
| 5        | 33703.0          | 296.7              | 0.000000000        | 0.00000        | -0.00000        | -0.00000       | -0.00000        |

|    |                |              |                    |                 |                |                |                |                 |
|----|----------------|--------------|--------------------|-----------------|----------------|----------------|----------------|-----------------|
| 6  | 33714.4        | 296.6        | 0.000000000        | 0.00000         | 0.00000        | 0.00000        | 0.00000        | -0.00001        |
| 7  | <b>37066.8</b> | <b>269.8</b> | <b>5.850147210</b> | <b>51.95854</b> | <b>0.00000</b> | <b>0.00000</b> | <b>0.00000</b> | <b>-7.20823</b> |
| 8  | 41091.7        | 243.4        | 0.000000000        | 0.00000         | -0.00000       | -0.00000       | 0.00000        | 0.00000         |
| 9  | 43553.7        | 229.6        | 0.000000000        | 0.00000         | -0.00000       | -0.00000       | 0.00001        | 0.00001         |
| 10 | 43564.1        | 229.5        | 0.000000000        | 0.00000         | 0.00000        | -0.00000       | -0.00004       | -0.00004        |
| 11 | 39193.2        | 255.1        | 0.000000000        | 0.00000         | -0.00000       | -0.00000       | 0.00000        | 0.00000         |
| 12 | 39194.8        | 255.1        | 0.000000000        | 0.00000         | 0.00000        | -0.00000       | 0.00001        | 0.00001         |
| 13 | 40117.9        | 249.3        | 0.000000000        | 0.00000         | 0.00000        | -0.00000       | -0.00000       | -0.00000        |
| 14 | 35334.2        | 283.0        | 0.000000001        | 0.00000         | 0.00000        | 0.00000        | 0.00000        | -0.00007        |
| 15 | 49565.2        | 201.8        | 0.000000000        | 0.00000         | 0.00000        | 0.00000        | 0.00000        | -0.00000        |
| 16 | 51787.4        | 193.1        | 0.000000000        | 0.00000         | -0.00000       | 0.00000        | -0.00000       | -0.00000        |
| 17 | 51798.4        | 193.1        | 0.000000000        | 0.00000         | 0.00000        | 0.00000        | 0.00000        | 0.00000         |
| 18 | 55751.9        | 179.4        | 0.000000000        | 0.00000         | -0.00003       | 0.00001        | 0.00000        | 0.00000         |
| 19 | 48494.3        | 206.2        | 0.000000000        | 0.00000         | 0.00000        | -0.00000       | -0.00000       | -0.00000        |
| 20 | 48583.1        | 205.8        | 0.000000000        | 0.00000         | 0.00000        | -0.00000       | 0.00000        | 0.00000         |
